# Supplementary material for: 10-21-Level optical frequency dissemination over 2067 km of noise-loaded fiber network
Source: Research Square preprint supplement (doi:10.21203/rs.3.rs-7922888/v1), 2025-11-03
Supplement: Supplementary file 1 [file e77e72d07e7203a1ccf348a6.docx]

**Supplementary Information**

**Detailed overview of the cascaded long-haul OFD link**

The ultra-stable frequency dissemination infrastructure is implemented over a 2067 km fiber loop connecting two parallel telecommunication fibers within a shared cable duct, establishing a link between the western (Taihu) and eastern (Shanghai) terminals. The path traverses 18 major metropolitan areas across China. Twelve actively stabilized repeater stations subdivide the entire link into segments ( each < 230 km ) to ensure robust phase noise suppression. The system employs dense wavelength division multiplexing (DWDM) to enable simultaneous ultra-precision frequency dissemination and conventional data traffic over the same fiber infrastructure.

The optical frequency reference signal is generated at the Chuzhou Station and propagates bidirectionally through the looped network via Shanghai and Taihu before returning to Chuzhou for comprehensive stability assessment. The total link loss, incorporating fiber attenuation, splice points, and connector losses, amounts to approximately 600 dB, corresponding to an average attenuation of 0.29 dB/km. To compensate for this substantial loss, 34 remotely controllable bidirectional erbium-doped fiber amplifiers (bi-EDFAs) are deployed across the 18 metropolitan nodes (see Tab. [2](#bookmark37)). Each bi-EDFA provides 10–30 dB of bidirectional gain.

Critical measures were implemented to ensure transmission integrity and amplifier stability. Dual-pumping schemes are employed in all amplifiers to mitigate the risk of self-oscillation under high-gain conditions. Fusion splicing losses are rigorously controlled to below 0.05 dB per splice. Backward pumping amplification is utilized in both propagation directions at the initial stage to minimize nonlinear optical effects. Furthermore, optical filters with a 25 GHz bandwidth are installed before and after each pump stage to suppress out-of-band amplified spontaneous emission (ASE) noise, thereby ensuring amplifier stability and enhancing the overall signal-to-noise ratio.

**Table 1**: Segment-wise attenuation characteristics of the 2067 km cascaded fiber link. Fiber link1 and link2 denote the two parallel fibers within the shared duct.

| **Segment** | **Length** | **Attenuation of fiber link1** | **Attenuation of fiber link2** |
| --- | --- | --- | --- |
| Taihu and Qianshan | 54.2 km | 19.3 dB | 17.5 dB |
| Qianshan and Anqing | 55.5 km | 15.9 dB | 17.8 dB |
| Anqing and Tongcheng | 84.1 km | 25.5 dB | 24.7 dB |
| Tongcheng and Shucheng | 59.7 km | 18.9 dB | 20.9 dB |
| Shucheng and Hefei | 64.5 km | 21.3 dB | 19.1 dB |
| Hefei and Chuzhou | 81.8 km | 27.5 dB | 28.8 dB |
| Chuzhou and Chuzhoudong | 61.4 km | 17.5 dB | 16.4 dB |
| Chuzhoudong and Nanjing | 78.4 km | 20.6 dB | 21.3 dB |
| Nanjing and Nanjingdong | 37.0 km | 9.6 dB | 10.5 dB |
| Nanjingdong and Zhenjiang | 76.0 km | 20.8 dB | 19.9 dB |
| Zhenjiang and Danyang | 43.2 km | 11.9 dB | 13.2 dB |
| Danyang and Changzhou | 64.8 km | 16.8 dB | 18.8 dB |
| Changzhou and Wuxi | 62.7 km | 17.6 dB | 17.5 dB |
| Wuxi and Suzhou | 69.9 km | 15.7 dB | 16.9 dB |
| Suzhou and Kunshan | 51.8 km | 12.2 dB | 12.4 dB |
| Kunshan and Shanghaixi | 64.2 km | 20.3 dB | 20.3 dB |
| Shanghaixi and Shanghai | 24.5 km | 6.0 dB | 6.0 dB |
